# Supplementary material for: A new crystal family of GaNGeC quaternary compounds including direct band gap semiconductors and metals
Source: Royal Society of Chemistry journal article supplement (doi:10.1039/d0ma00844c), 2021-01-01
Supplement: d0ma00844c1.pdf [file d0ma00844c1.pdf]

## **New Crystal Family of GaNGeC Quaternary Compound Including Direct Band Gap Semiconductors and metals**

Ping Lou <sup>\*ab</sup> and Jin Yong Lee <sup>\*a</sup>

---

<sup>a</sup> *Department of Chemistry, Sungkyunkwan University, Suwon 16419, Korea*  
*Email: jinylee@skku.edu*

<sup>b</sup> *Department of Physics, Anhui University, Hefei 230039, Anhui, China.*  
*Email: loup@ahu.edu.cn*

## Table of Contents

1. Figure S1: The total energy per atom as a function of volume per atom — S3
2. Figure S2: The pressure as a function of volume per atom — S3
3. Table S1: Fractional Coordinates of the Atom in the Primitive Cell — S4
4. Figure S3: Atom-resolved projected phonon dispersions of S-1 crystal — S5
5. Figure S4: Atom-resolved projected phonon dispersions of S-2 crystal — S5
6. Figure S5: Atom-resolved projected phonon dispersions of S-3 crystal — S6
7. Figure S6: Atom-resolved projected phonon dispersions of S-4 crystal — S6
8. Figure S7: Atom-resolved projected phonon dispersions of S-5 crystal — S7
9. Figure S8: Atom-resolved projected phonon dispersions of S-6 crystal — S7
10. Figure S9: Atom-resolved projected phonon dispersions of S-7 crystal — S8
11. Figure S10: Atom-resolved projected phonon dispersions of S-8 crystal — S8
12. Figure S11: Optical absorption coefficient ( $\alpha(\omega)$ ) of S-1 crystal — S9
13. Figure S12: Optical absorption coefficient ( $\alpha(\omega)$ ) of S-2 crystal — S9
14. Figure S13: Optical absorption coefficient ( $\alpha(\omega)$ ) of S-3 crystal — S10
15. Figure S14: Optical absorption coefficient ( $\alpha(\omega)$ ) of S-4 crystal — S10
16. Figure S15: Optical absorption coefficient ( $\alpha(\omega)$ ) of S-5 crystal — S11
17. Figure S16: Optical absorption coefficient ( $\alpha(\omega)$ ) of S-6 crystal — S11
18. Figure S17: PBE, SCAN, and HSE06 band structures of S-1 crystal — S12
19. Figure S18: PBE, SCAN, and HSE06 band structures of S-2 crystal — S12
20. Figure S19: PBE, SCAN, and HSE06 band structures of S-3 crystal — S13
21. Figure S20: PBE, SCAN, and HSE06 band structures of S-4 crystal — S13
22. Figure S21: PBE, SCAN, and HSE06 band structures of S-5 crystal — S14
23. Figure S22: PBE, SCAN, and HSE06 band structures of S-8 crystal — S14
24. Figure S23: PBE, SCAN, HSE06 , and GW band gaps. — S15
25. Figure S24: PBE, SCAN, and HSE06 band structures of S-7 crystal — S15
26. Figure S25: PBE, SCAN, and HSE06 band structures of S-8 crystal — S16

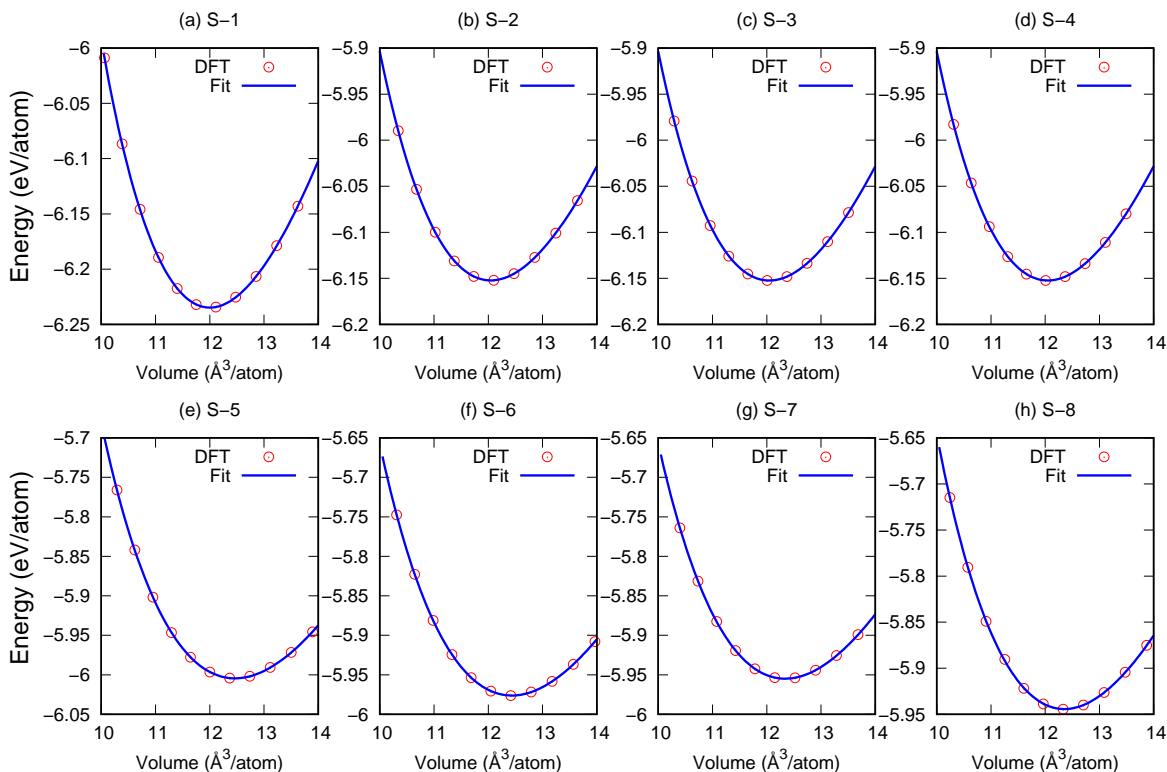

**Fig. S1** (Color online) The total energy per atom as a function of volume per atom. The red dot marks the calculated value of the standard density functional theory (DFT), and the blue line marks the fitting result (Fit).

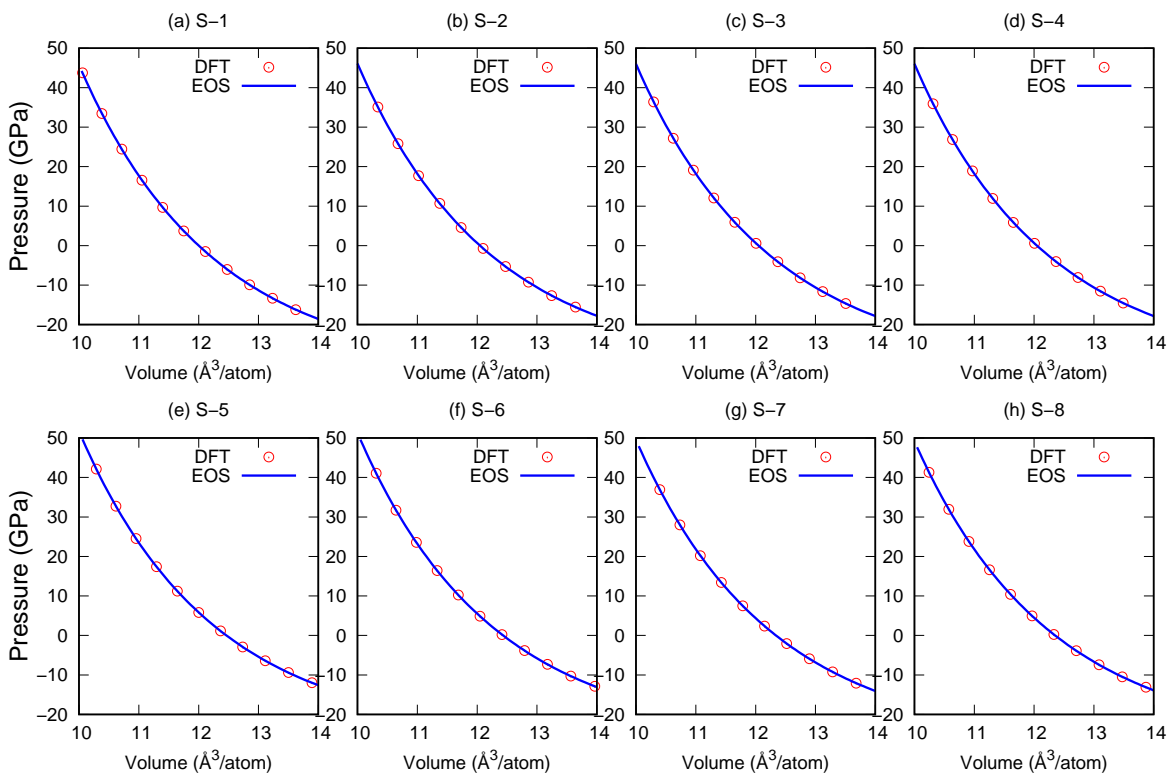

**Fig. S2** (Color online) The pressure as a function of volume per atom. The red dot marks the calculated value of the standard density functional theory (DFT), and the blue line is the fitting result of the Vinet equation of state (EOS) (P. Vinet, J. Ferrante, J. H. Rose and J. R. Smith, *J. Geophys. Res.* 1987, **92**, 9319-9325).

Table S1 Fractional Coordinates of the Atom in the Primitive Cell, and Wyckoff Positions of Group.

|     |                     |                     |                      |    |
|-----|---------------------|---------------------|----------------------|----|
| S-1 |                     |                     | <i>P3m1</i> (No.156) |    |
| Ge  | 0.6666666666666714, | 0.3333333333333286, | 0.3624599819999971   | 1c |
| C   | 0.3333333333333286, | 0.6666666666666714, | 0.4790199799999968   | 1b |
| Ga  | 0.3333333333333286, | 0.6666666666666714, | 0.8624199910000031   | 1b |
| N   | 0.6666666666666714, | 0.3333333333333286, | 0.9960899690000034   | 1c |
| S-2 |                     |                     | <i>Pmm2</i> (No. 25) |    |
| Ge  | 0.5000000000000000, | 0.0000000000000000, | 0.3069426505183119   | 1c |
| C   | 0.0000000000000000, | 0.0000000000000000, | 0.5409335387865466   | 1a |
| Ga  | 0.0000000000000000, | 0.5000000000000000, | 0.7934918935126746   | 1b |
| N   | 0.5000000000000000, | 0.5000000000000000, | 0.0586318951824683   | 1d |
| S-3 |                     |                     | <i>Pmm2</i> (No. 25) |    |
| Ge  | 0.0000000000000000, | 0.0000000000000000, | 0.5877554933025234   | 1a |
| C   | 0.5000000000000000, | 0.0000000000000000, | 0.8216899701073591   | 1c |
| Ga  | 0.5000000000000000, | 0.5000000000000000, | 0.0742271464295536   | 1d |
| N   | 0.0000000000000000, | 0.5000000000000000, | 0.3394273351605525   | 1a |
| S-4 |                     |                     | <i>Pmm2</i> (No. 25) |    |
| Ge  | 0.5000000000000000, | 0.5000000000000000, | 0.8158552834755285   | 1d |
| C   | 0.0000000000000000, | 0.5000000000000000, | 0.5818794706489309   | 1b |
| Ga  | 0.0000000000000000, | 0.0000000000000000, | 0.3293138608568018   | 1a |
| N   | 0.5000000000000000, | 0.0000000000000000, | 0.0641713230187433   | 1c |
| S-5 |                     |                     | <i>R3m</i> (No. 160) |    |
| Ge  | 0.6709841743474934, | 0.6709841743474934, | 0.6709841743474934   | 1a |
| C   | 0.2911739297909084, | 0.2911739297909084, | 0.2911739297909084   | 1a |
| Ga  | 0.8190742803260118, | 0.8190742803260118, | 0.8190742803260118   | 1a |
| N   | 0.1995873262022444, | 0.1995873262022444, | 0.1995873262022444   | 1a |
| S-6 |                     |                     | <i>P3m1</i> (No.156) |    |
| Ge  | 0.6666667436180234, | 0.3333333243819752, | 0.3305940463622838   | 1c |
| C   | 0.3333333069338735, | 0.6666667660661290, | 0.1905461627035190   | 1b |
| Ga  | 0.6666668219594882, | 0.3333332460405103, | 0.7739294995641177   | 1c |
| N   | 0.3333332694886195, | 0.6666668035113830, | 0.9157003673700826   | 1b |
| S-7 |                     |                     | <i>R3m</i> (No. 160) |    |
| Ge  | 0.0456905218556258, | 0.0456905218556258, | 0.0456905218556258   | 1a |
| C   | 0.1644273372098013, | 0.1644273372098013, | 0.1644273372098013   | 1a |
| Ga  | 0.5330179664915136, | 0.5330179664915136, | 0.5330179664915136   | 1a |
| N   | 0.6649541884430761, | 0.6649541884430761, | 0.6649541884430761   | 1a |
| S-8 |                     |                     | <i>P3m1</i> (No.156) |    |
| Ge  | 0.0000000000000000, | 0.0000000000000000, | 0.3022743618233577   | 1a |
| C   | 0.0000000000000000, | 0.0000000000000000, | 0.6634581556066892   | 1a |
| Ga  | 0.3333333332999970, | 0.6666666670000012, | 0.7667517986069959   | 1b |
| N   | 0.3333333332999970, | 0.6666666670000012, | 0.1623056629629663   | 1b |



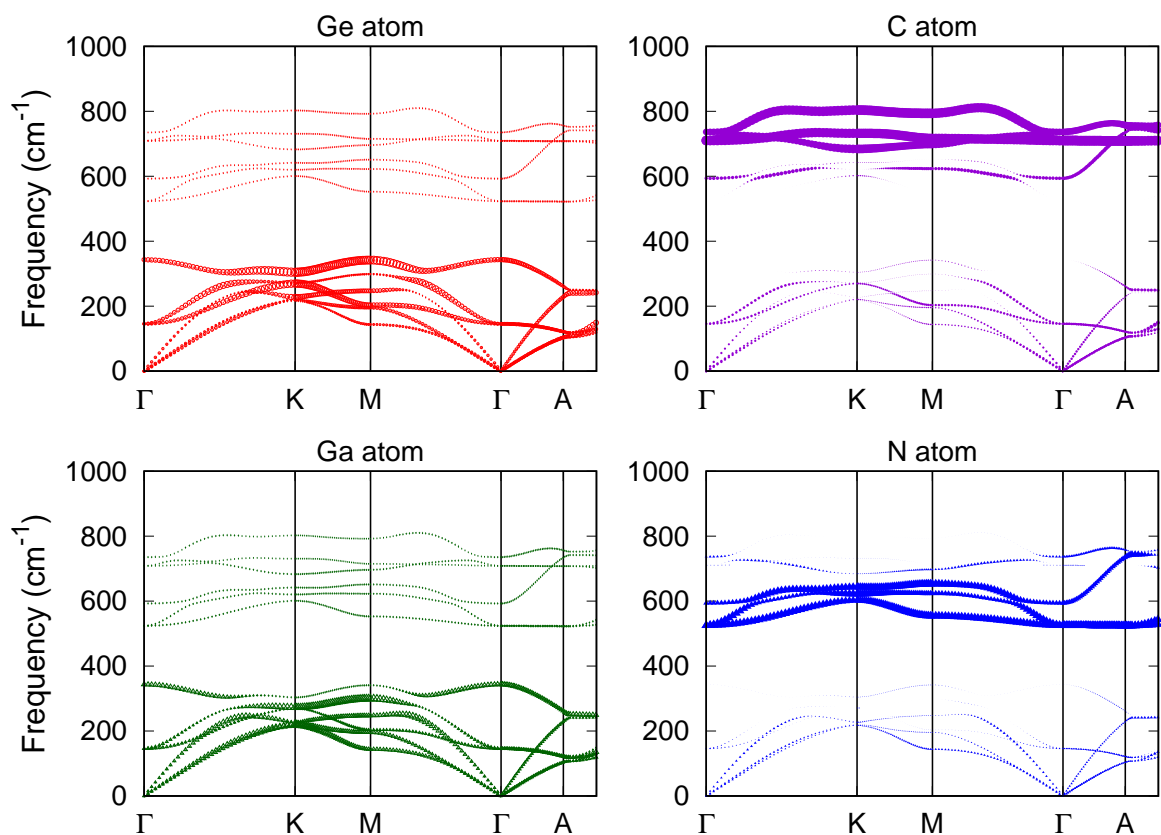

Fig. S3 (Color online) Atom-resolved projected phonon dispersions of S-1 crystal.

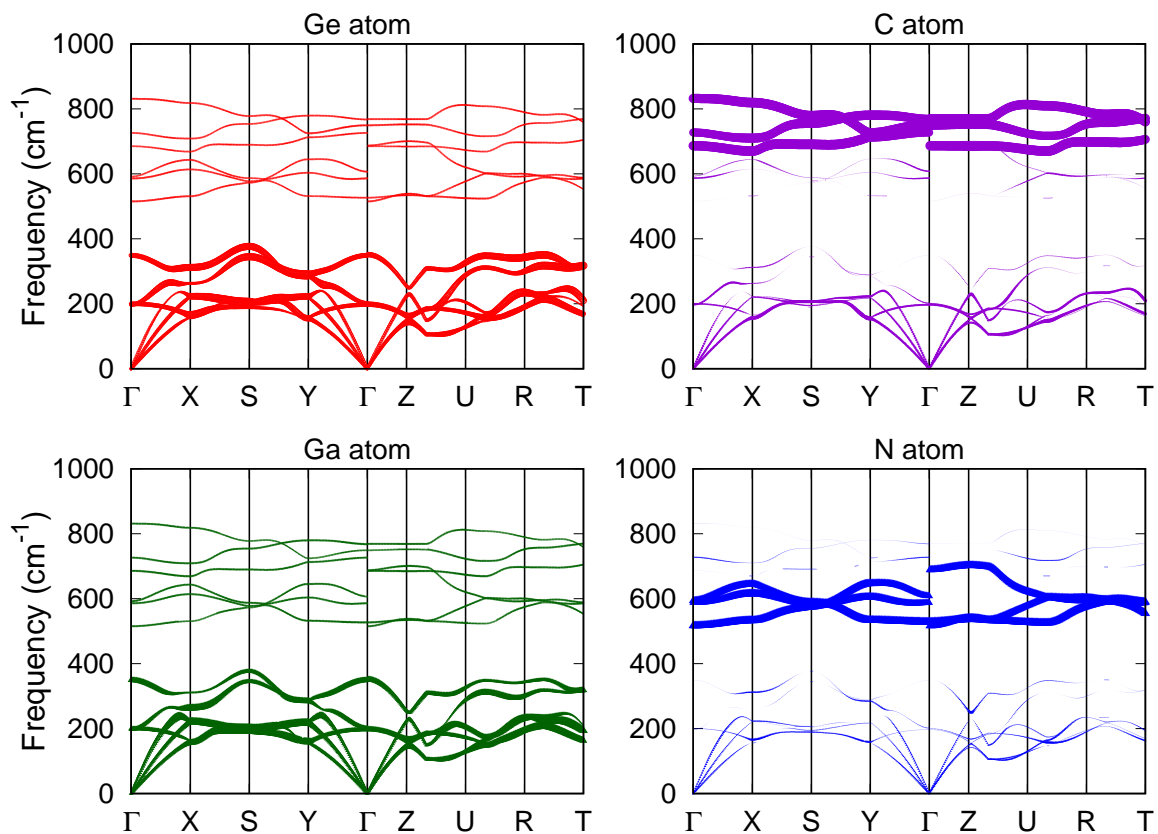

Fig. S4 (Color online) Atom-resolved projected phonon dispersions of S-2 crystal.

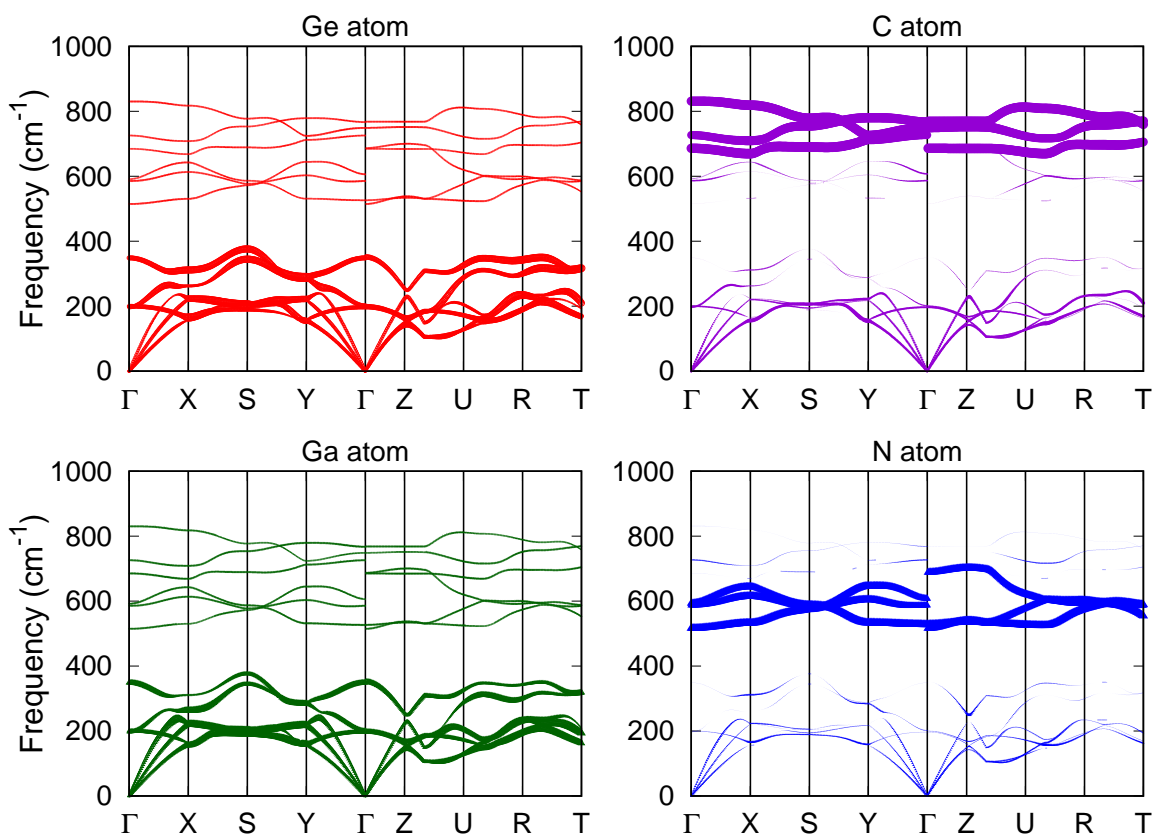

Fig. S5 (Color online) Atom-resolved projected phonon dispersions of S-3 crystal.

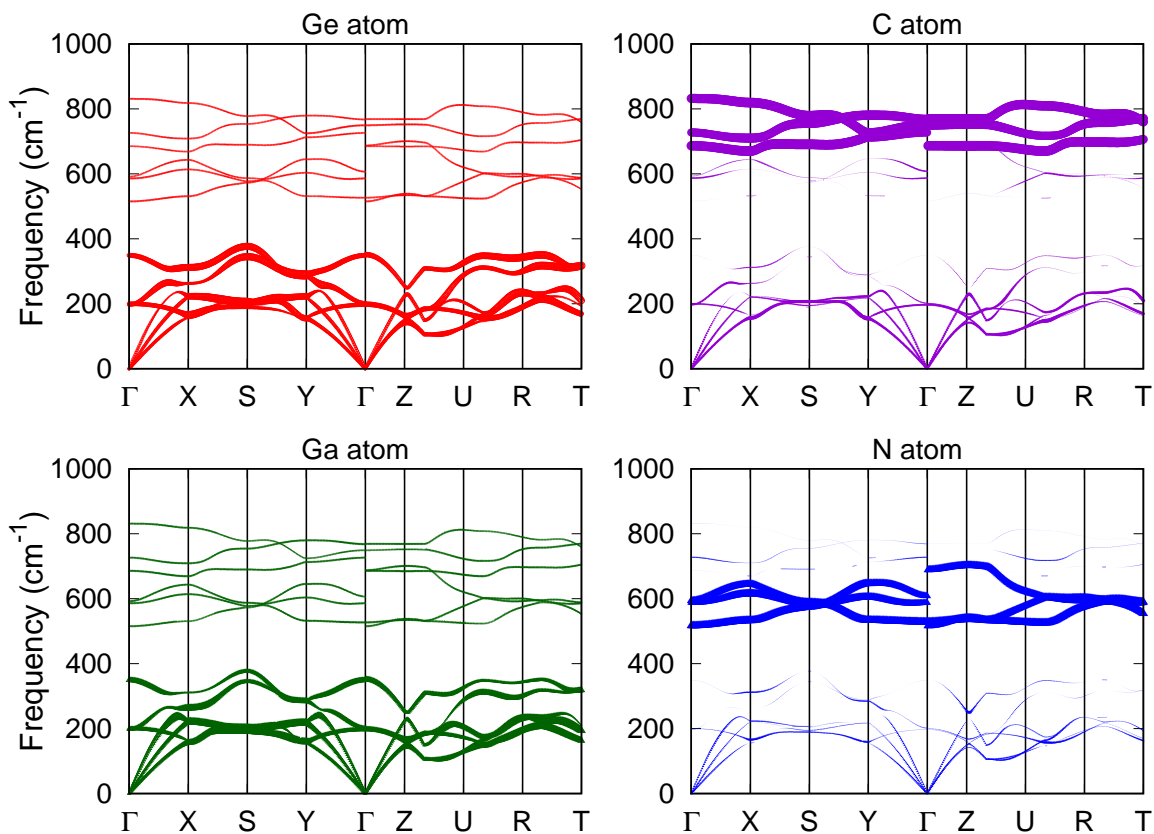

Fig. S6 (Color online) Atom-resolved projected phonon dispersions of S-4 crystal.

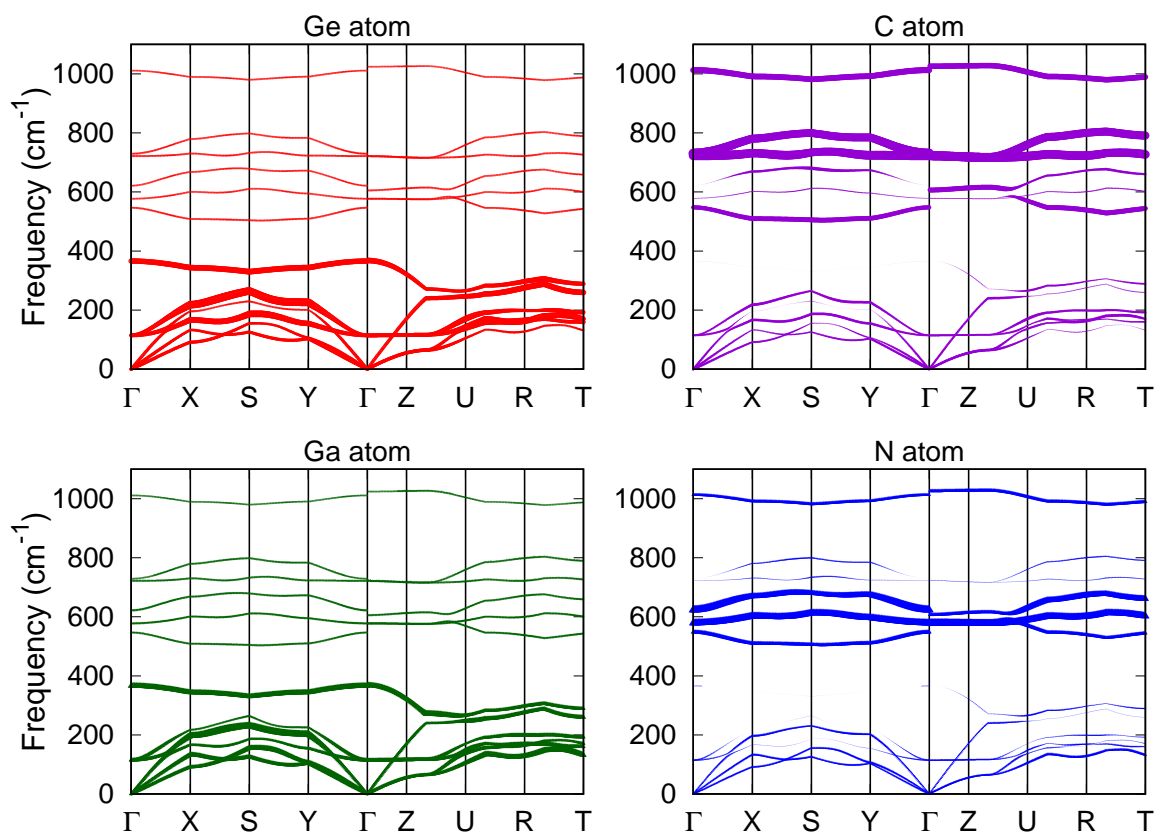

Fig. S7 (Color online) Atom-resolved projected phonon dispersions of S-5 crystal.

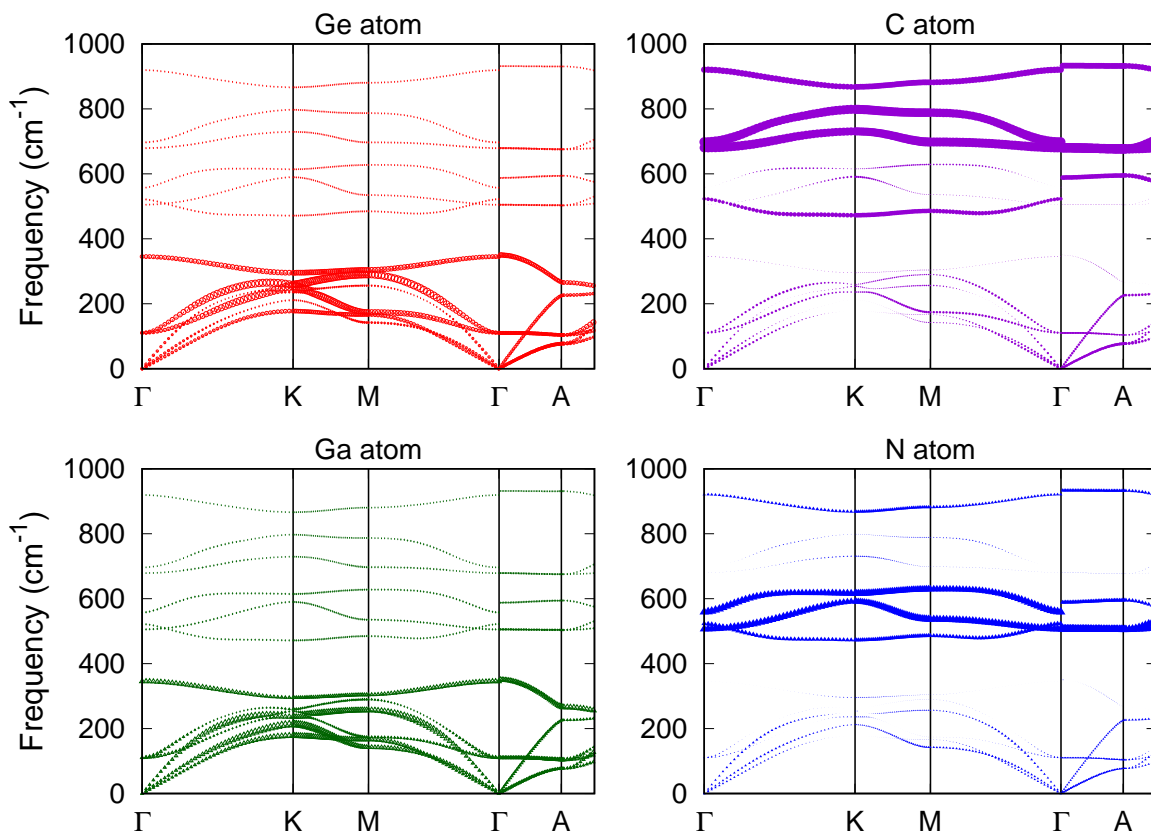

Fig. S8 (Color online) Atom-resolved projected phonon dispersions of S-6 crystal.

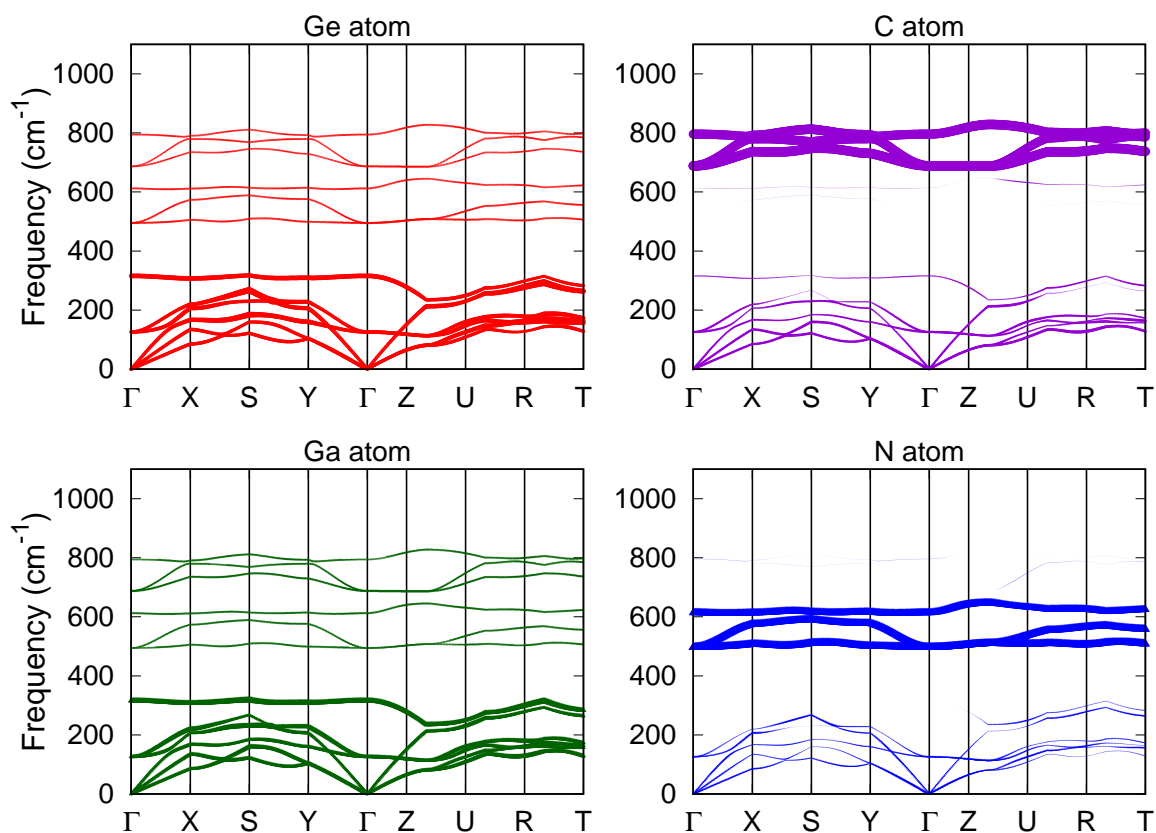

Fig. S9 (Color online) Atom-resolved projected phonon dispersions of S-7 crystal.

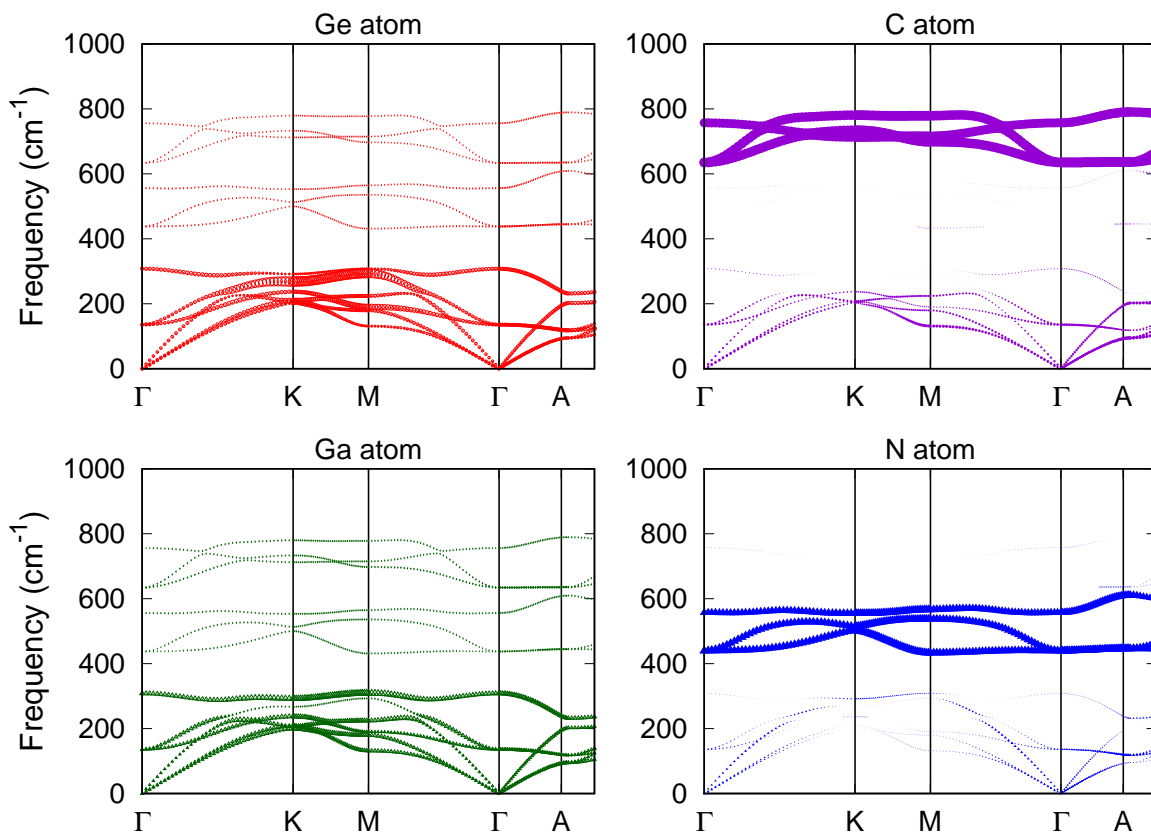

Fig. S10 (Color online) Atom-resolved projected phonon dispersions of S-8 crystal.

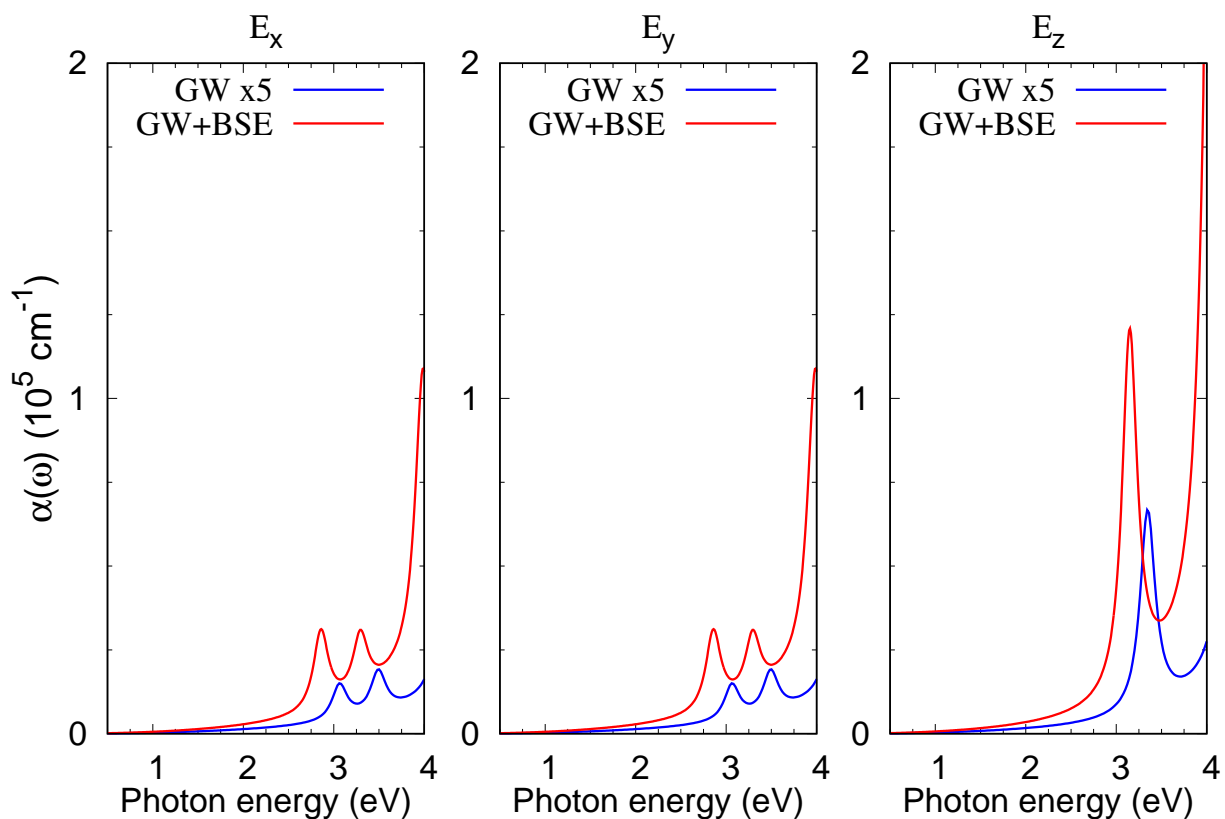

**Fig. S11** (Color online) Optical absorption coefficient ( $\alpha(\omega)$ ) of S-1 crystal, where  $\omega$  is the photon energy and  $E_x$ ,  $E_y$  and  $E_z$  indicate the direction of the polarized electric field.

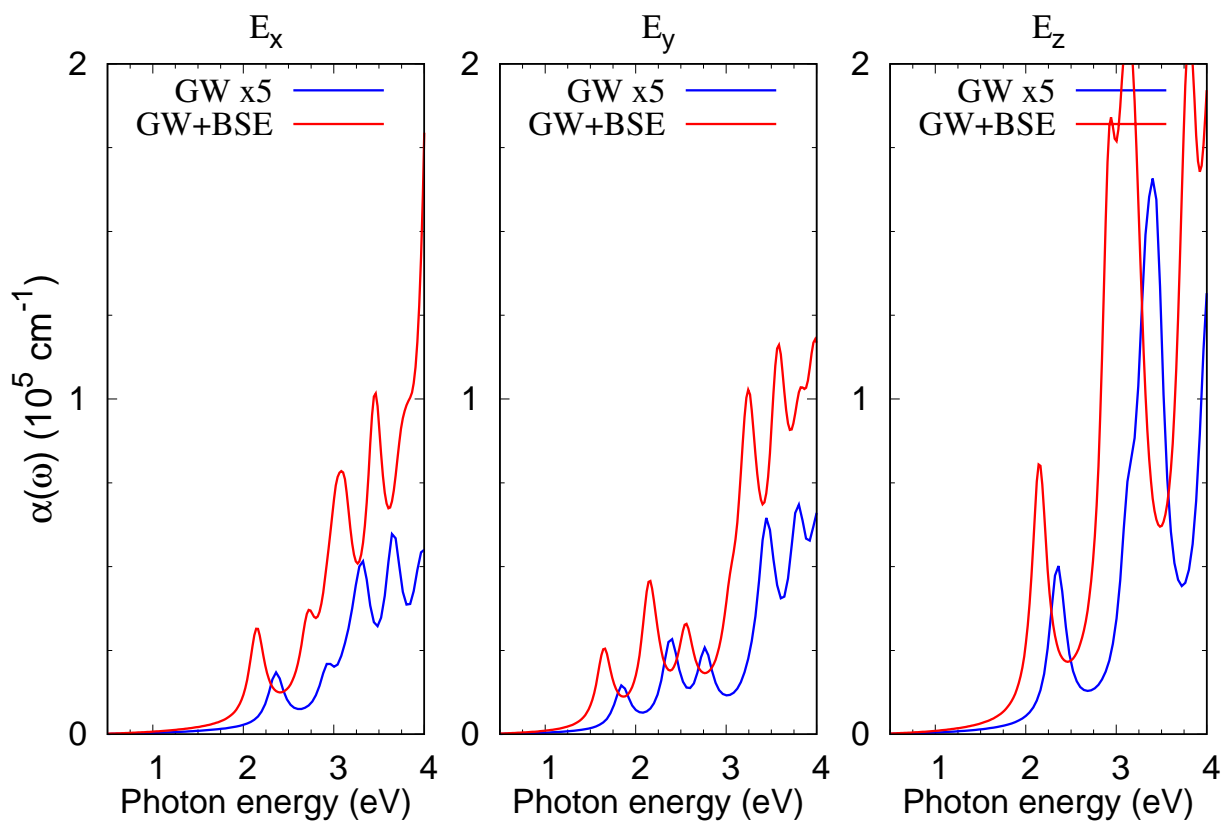

**Fig. S12** (Color online) Optical absorption coefficient ( $\alpha(\omega)$ ) of S-2 crystal, where  $\omega$  is the photon energy and  $E_x$ ,  $E_y$  and  $E_z$  indicate the direction of the polarized electric field.

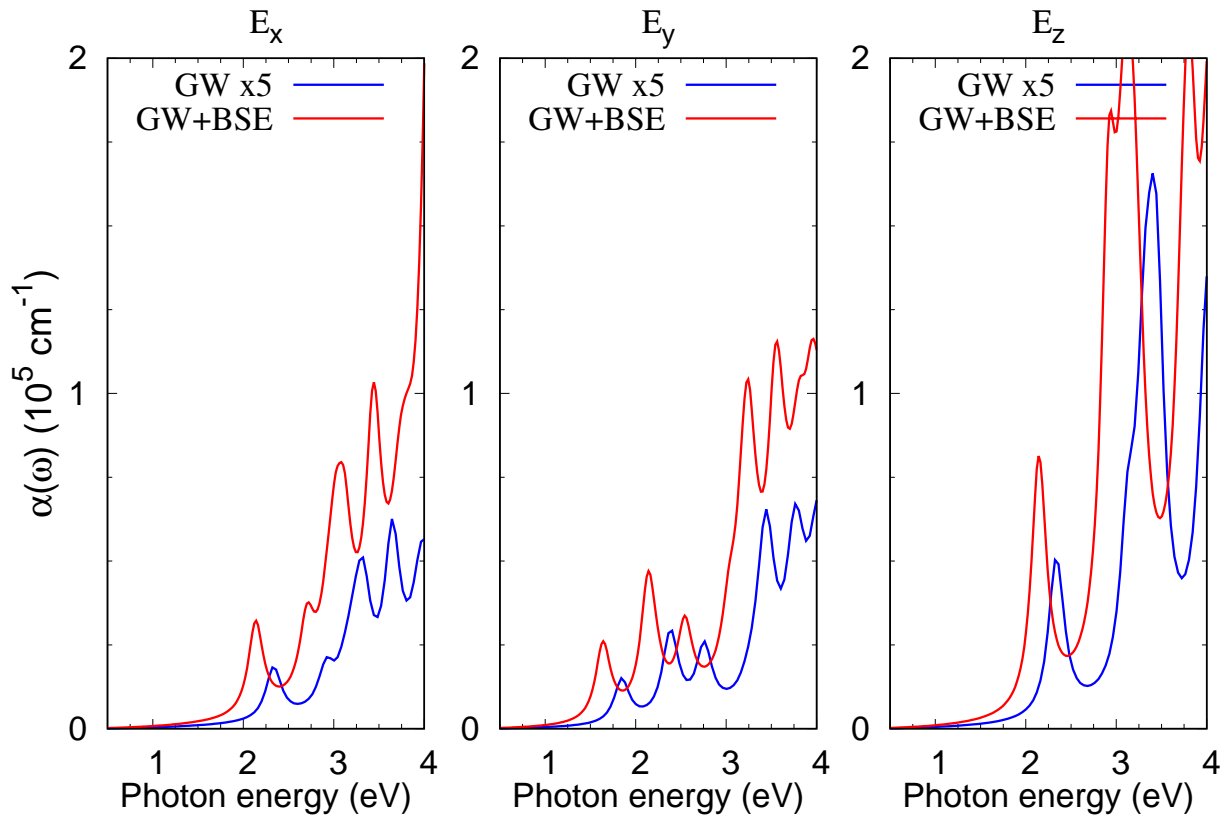

**Fig. S13** (Color online) Optical absorption coefficient ( $\alpha(\omega)$ ) of S-3 crystal, where  $\omega$  is the photon energy and  $E_x$ ,  $E_y$  and  $E_z$  indicate the direction of the polarized electric field.

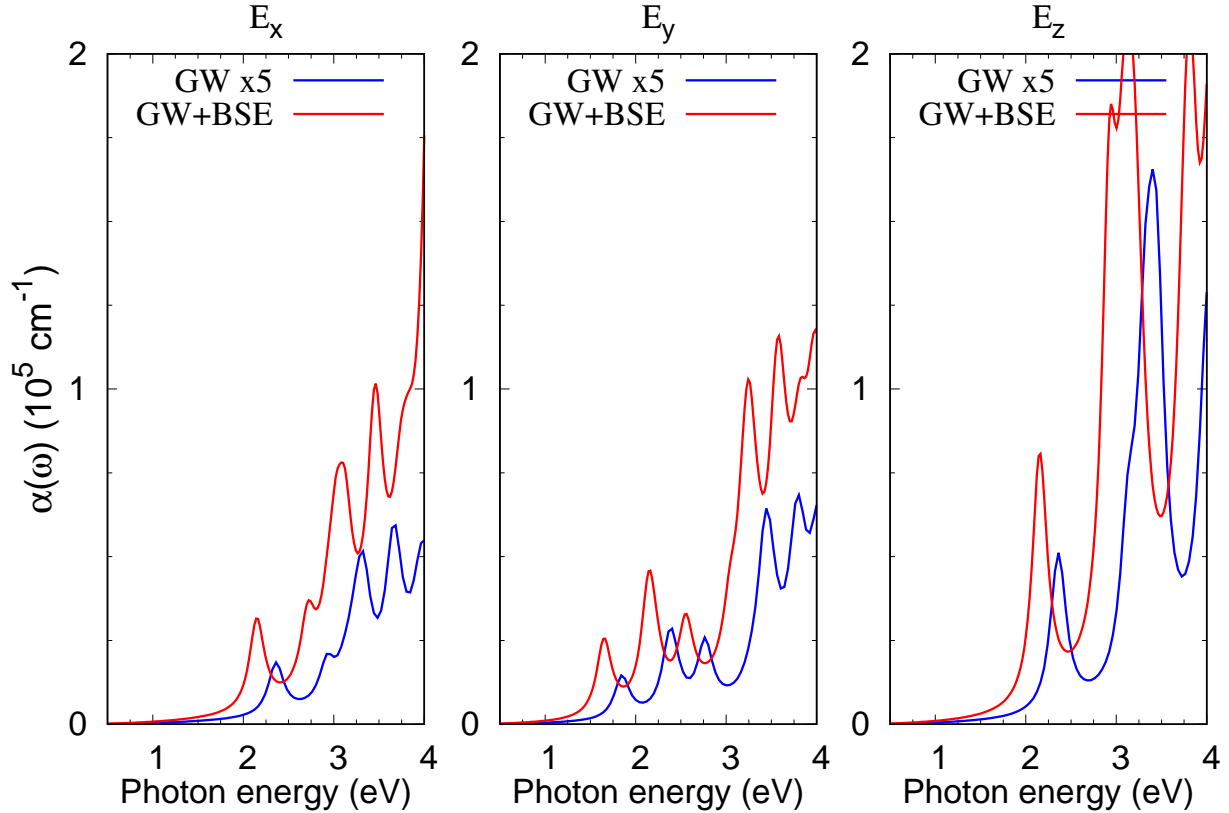

**Fig. S14** (Color online) Optical absorption coefficient ( $\alpha(\omega)$ ) of S-4 crystal, where  $\omega$  is the photon energy and  $E_x$ ,  $E_y$  and  $E_z$  indicate the direction of the polarized electric field.

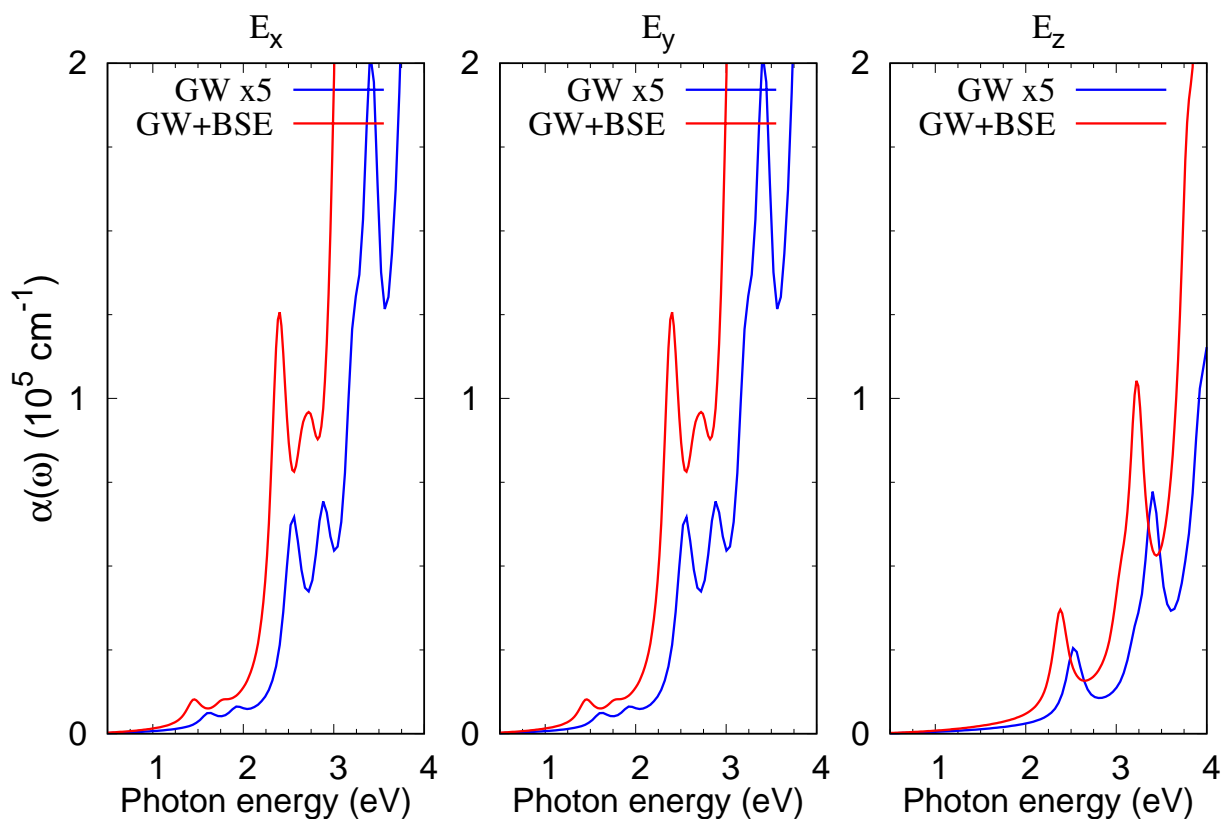

**Fig. S15** (Color online) Optical absorption coefficient ( $\alpha(\omega)$ ) of S-5 crystal, where  $\omega$  is the photon energy and  $E_x$ ,  $E_y$  and  $E_z$  indicate the direction of the polarized electric field.

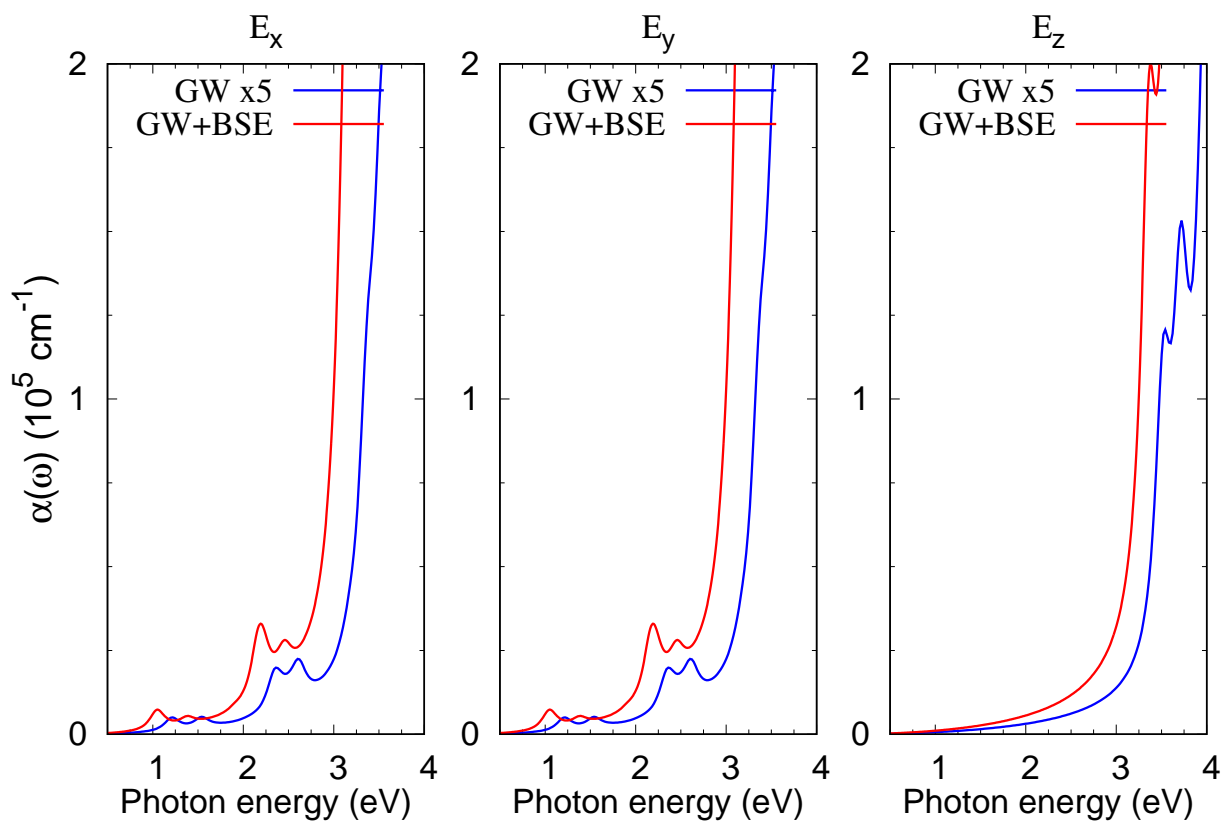

**Fig. S16** (Color online) Optical absorption coefficient ( $\alpha(\omega)$ ) of S-6 crystal, where  $\omega$  is the photon energy and  $E_x$ ,  $E_y$  and  $E_z$  indicate the direction of the polarized electric field.

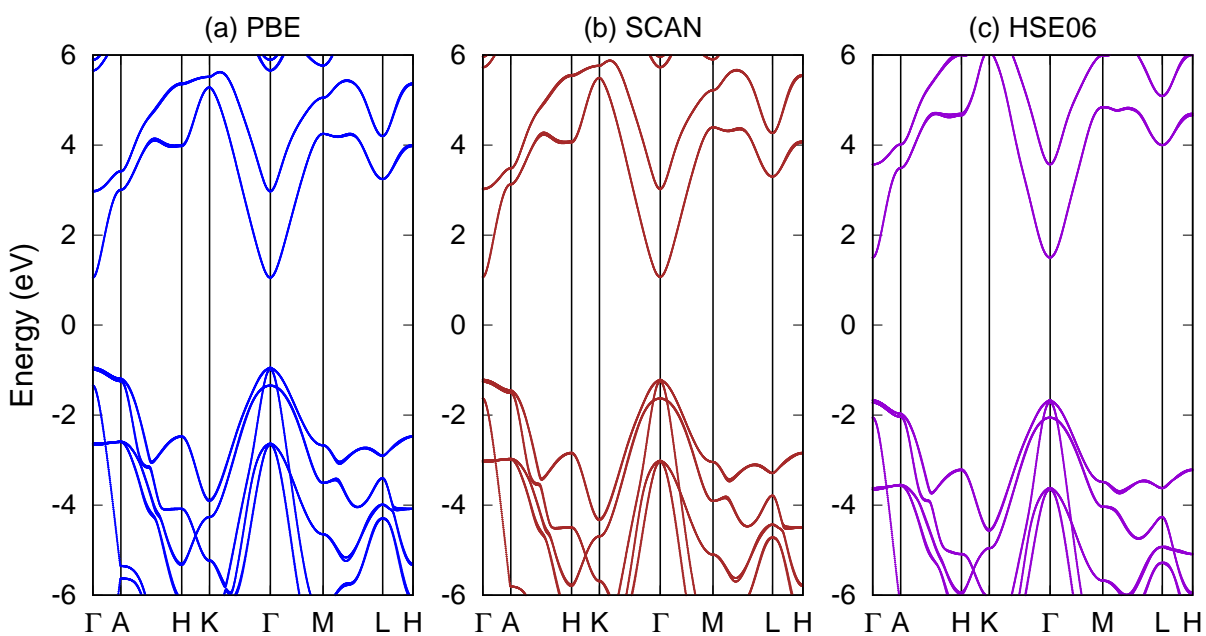

**Fig. S17** (Color online) Band structure of the S-1 crystal. (a)-(c) show the results calculated by PBE, SCAN, and HSE06 functionals, respectively.

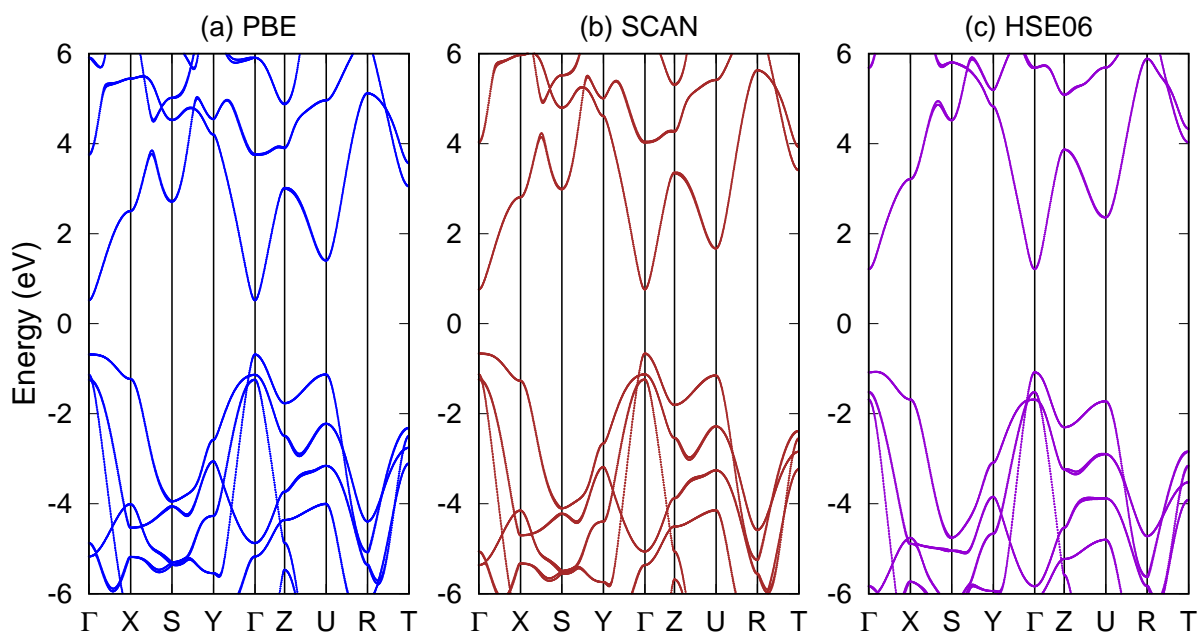

**Fig. S18** (Color online) Band structure of the S-2 crystal. (a)-(c) show the results calculated by PBE, SCAN, and HSE06 functionals, respectively.



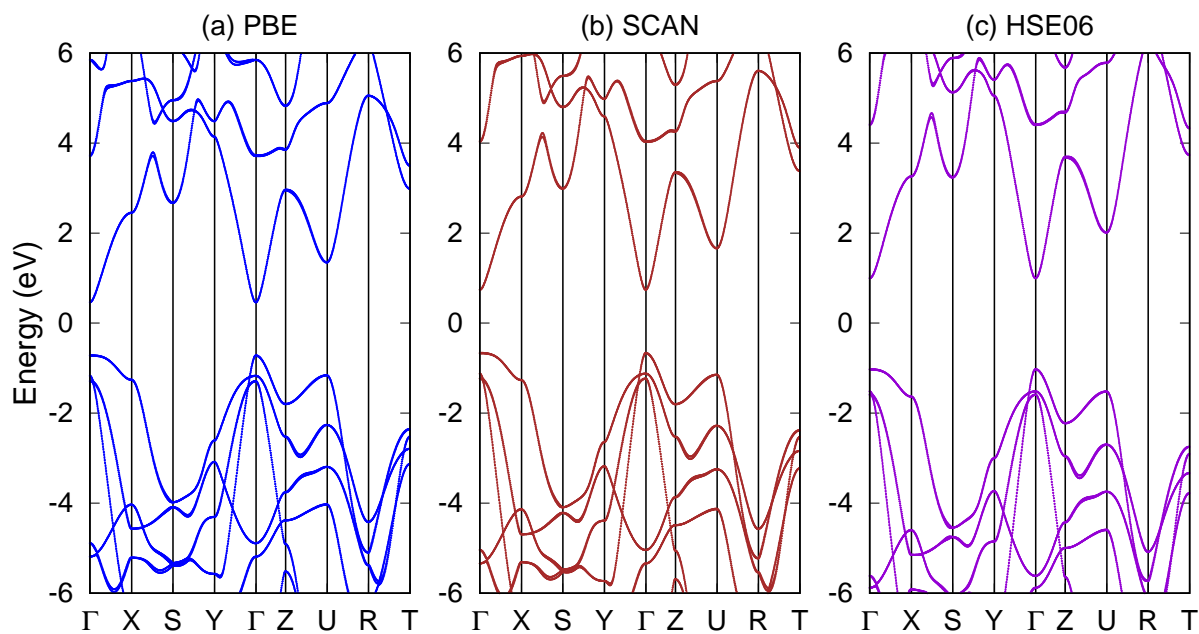

Fig. S19 (Color online) Band structure of the S-3 crystal. (a)-(c) show the results calculated by PBE, SCAN, and HSE06 functionals, respectively.

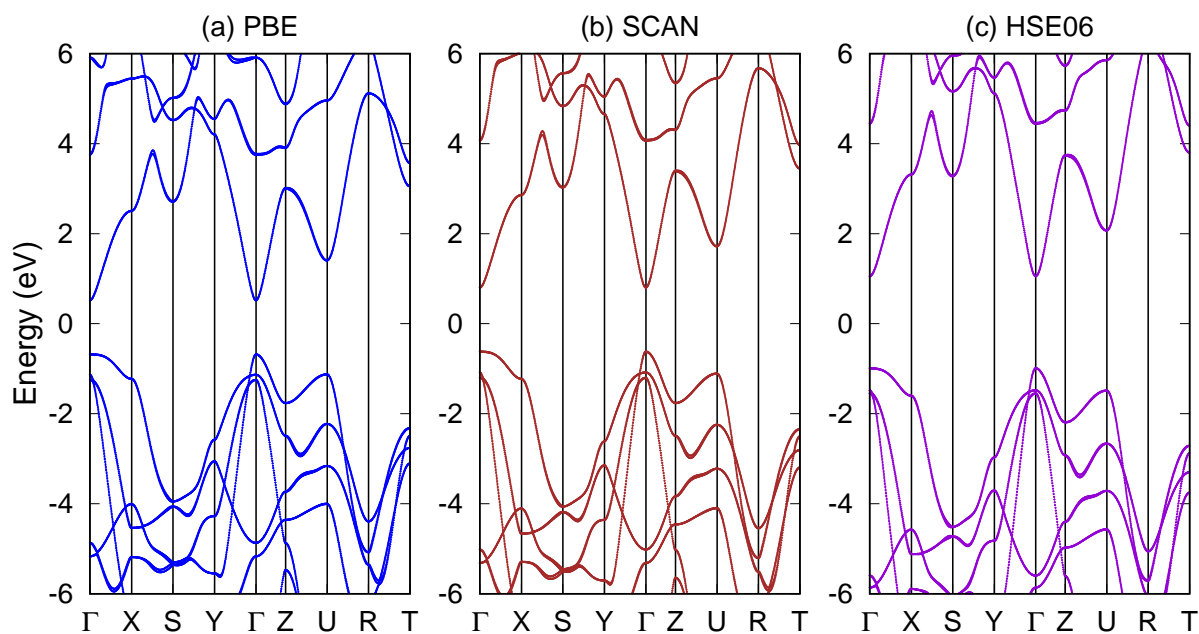

Fig. S20 (Color online) Band structure of the S-8 crystal. (a)-(c) show the results calculated by PBE, SCAN, and HSE06 functionals, respectively.

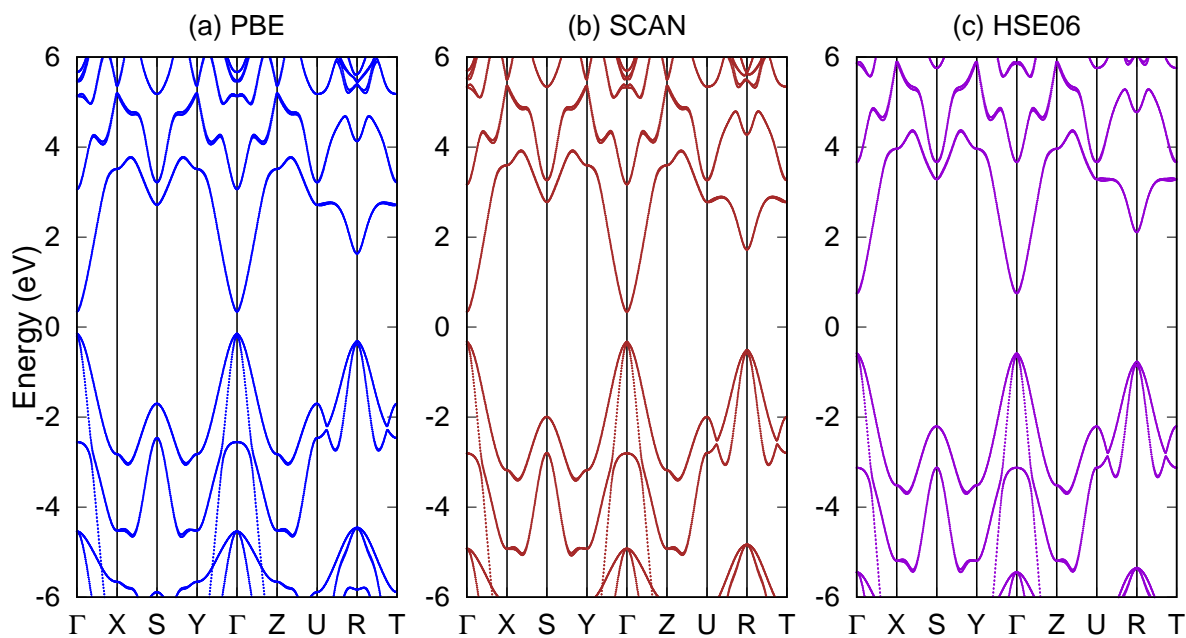

**Fig. S21** (Color online) Band structure of the S-5 crystal. (a)-(c) show the results calculated by PBE, SCAN, and HSE06 functionals, respectively.

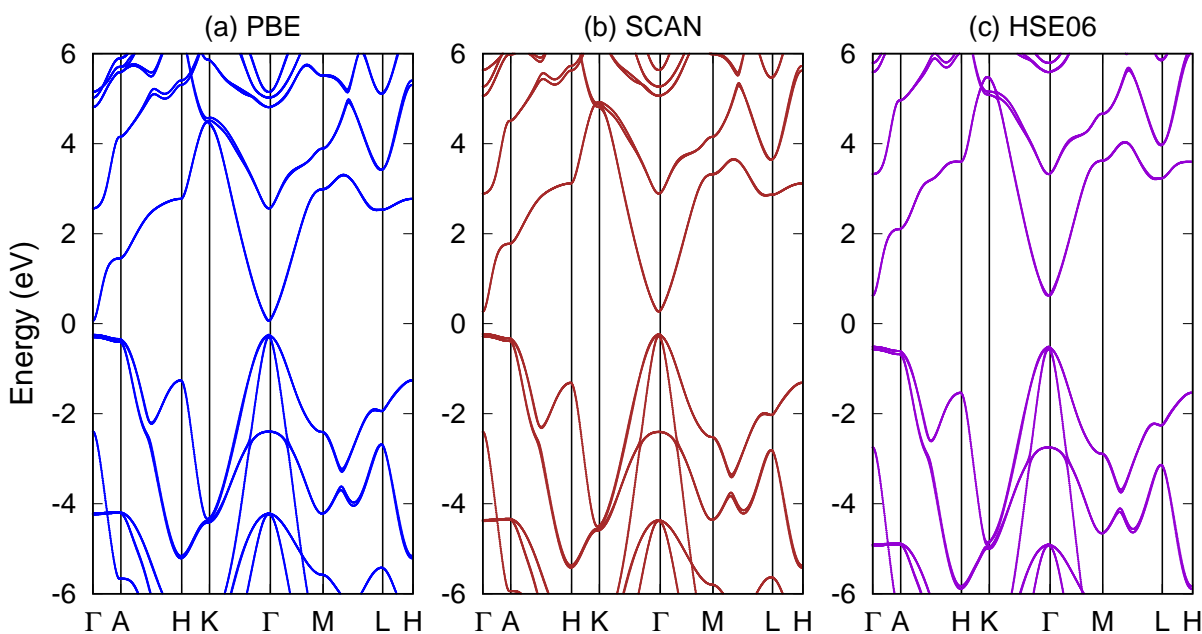

**Fig. S22** (Color online) Band structure of the S-8 crystal. (a)-(c) show the results calculated by PBE, SCAN, and HSE06 functionals, respectively.

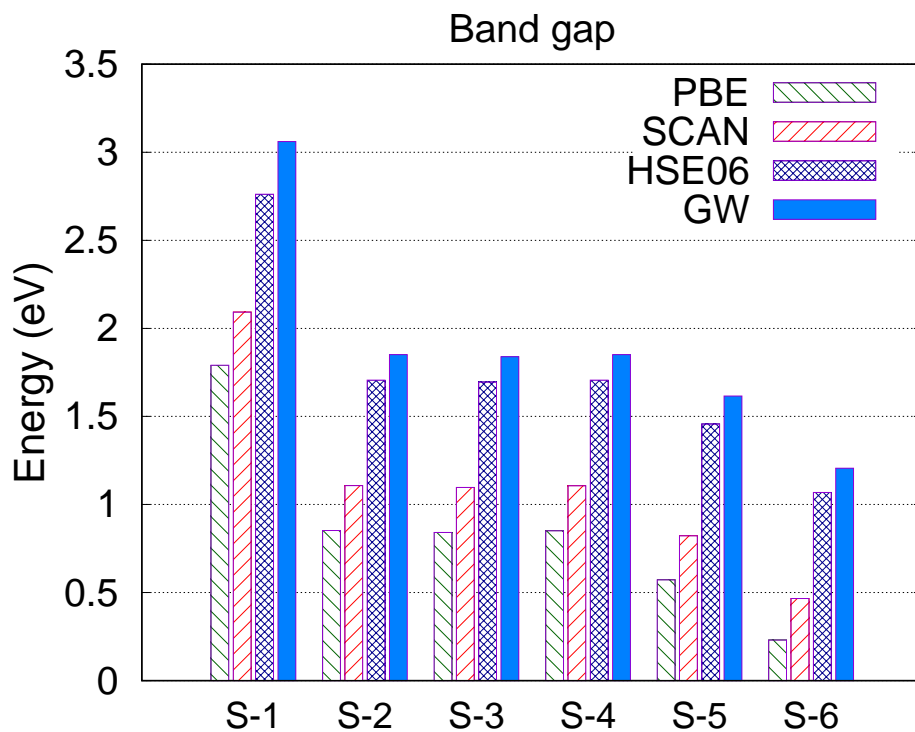

Fig. S23 (Color online) Band gaps calculated by PBE, SCAN, and HSE06 functionals, as well as *GW*, respectively.

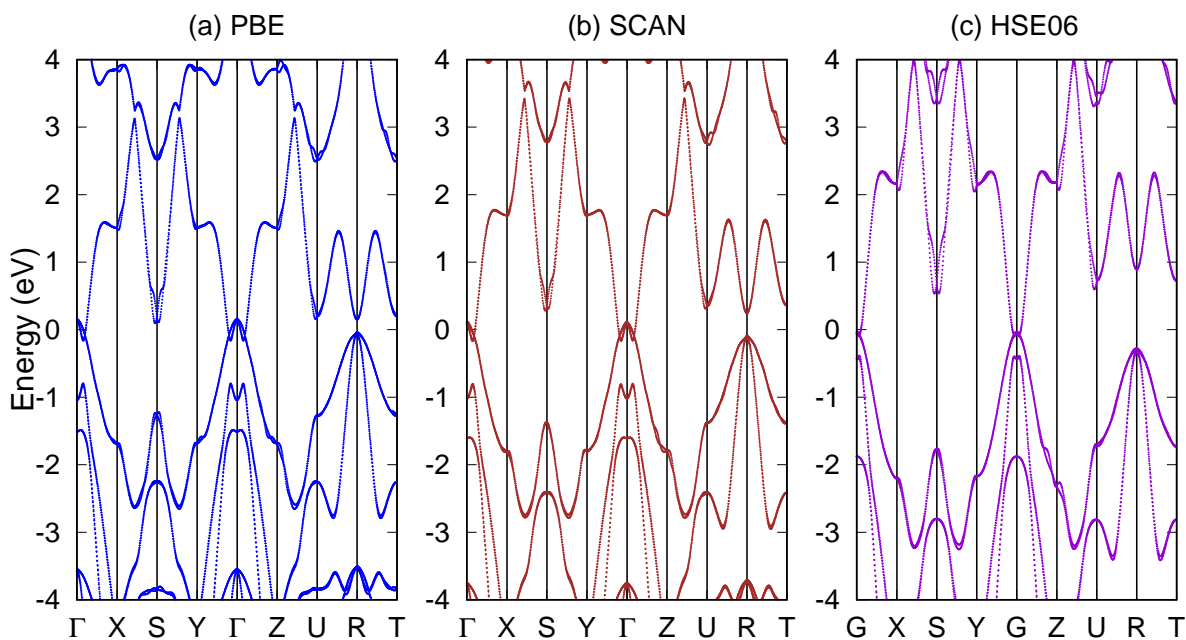

Fig. S24 (Color online) Band structure of the S-7 crystal. (a)-(c) show the results calculated by PBE, SCAN, and HSE06 functionals, respectively.

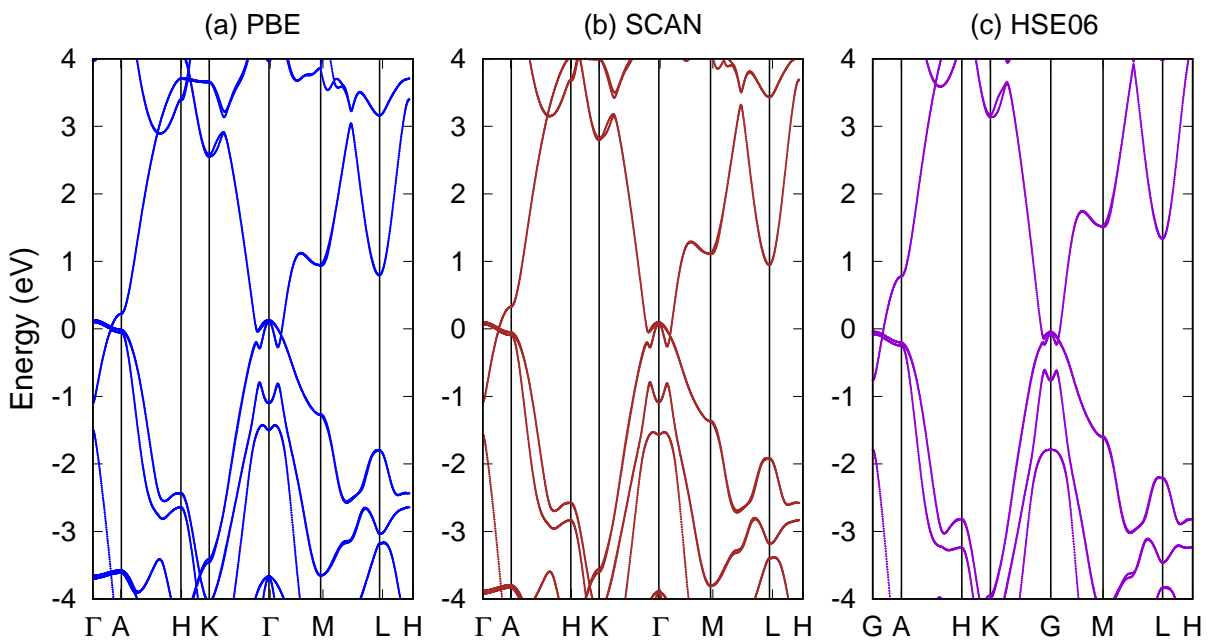

**Fig. S25** (Color online) Band structure of the S-8 crystal. (a)-(c) show the results calculated by PBE, SCAN, and HSE06 functionals, respectively.
